# Supplementary material
Source: MDPI journal article supplement (https://www.mdpi.com/2311-5637/8/9/427)

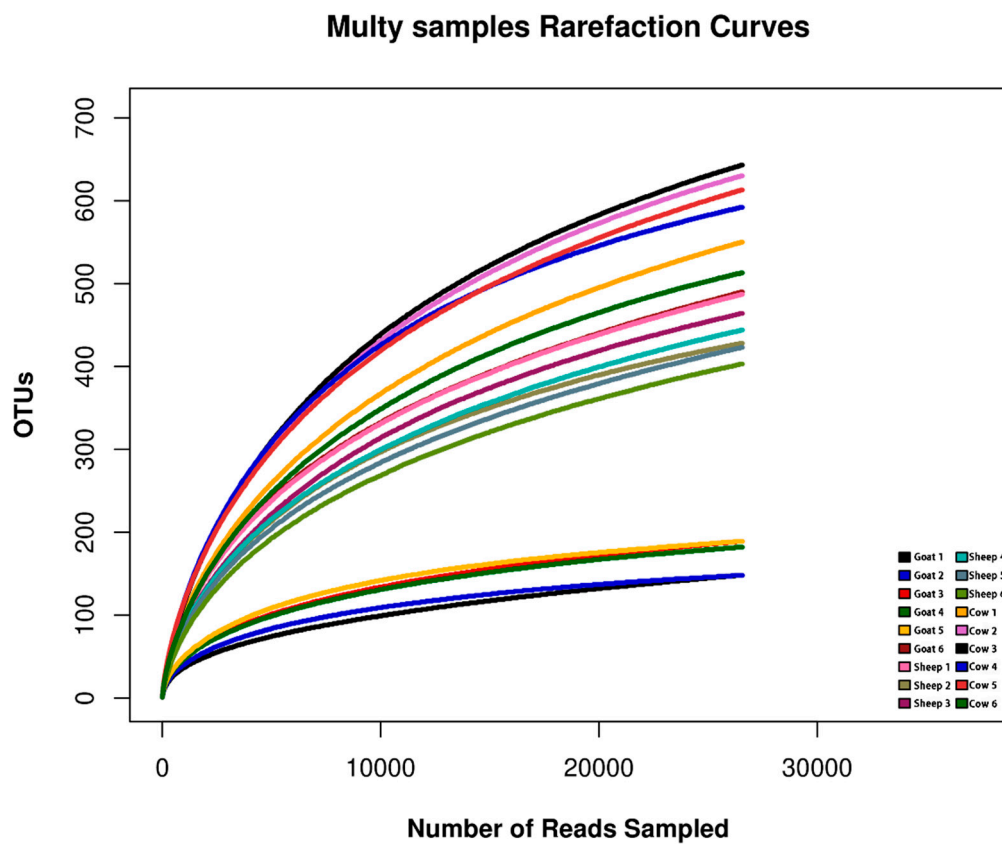

**Figure S1.** The rarefaction curve for each sample of the goat, sheep and cow groups.

Supplement: s1 [file s1]
